# Supplementary material for: A Reproducible and Scalable Process for Manufacturing a Pfs48/45 Based Plasmodium falciparum Transmission-Blocking Vaccine
Source: PubMed Central journal article supplement (PMC7832176; doi:10.3389/fimmu.2020.606266), 2021-01-11
Supplement: DataSheet_1.pdf [file DataSheet_1.pdf]

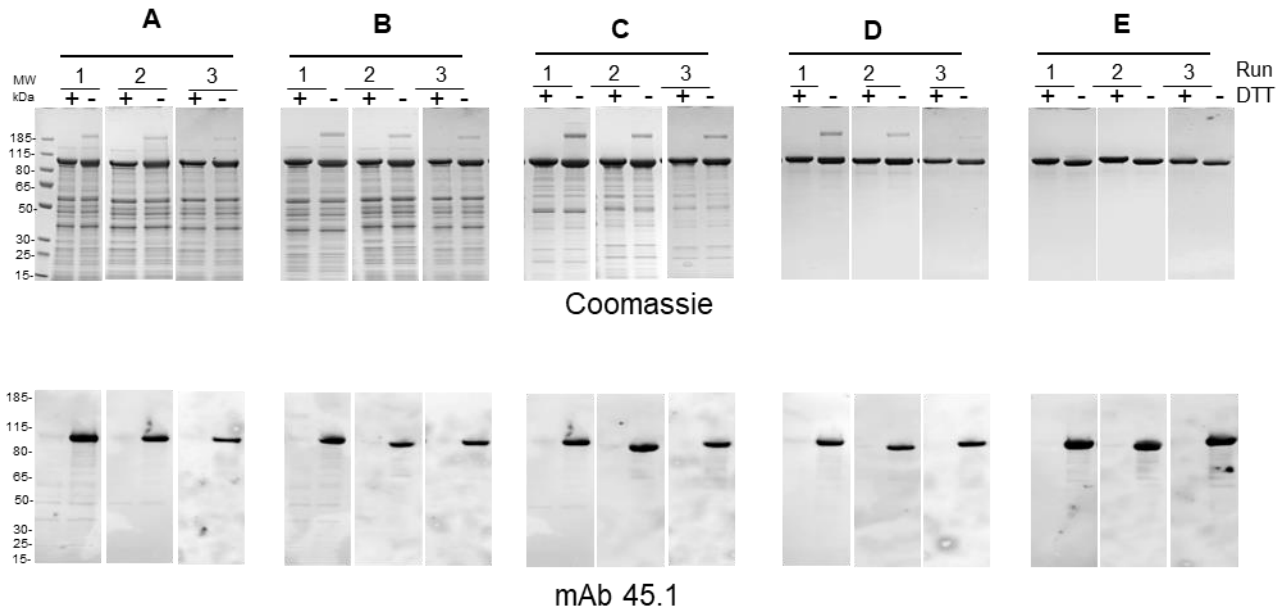

**Figure S1. SDS-PAGE analysis of each step of consistency runs.** *upper panel* Coomassie stained 4-12.5% polyacrylamide gel of (A) Supernatant (run 1-3), (B) Diafiltration (run 1-3), (C) eluate from capturing step (run 1-3), (D) eluate from HCP removal step (run 1-3), and (E) the final product the eluate from the polishing step (run 1-3). *Lower panel* an immune blot analysis of the same gel shown in the upper panel using mAb45.1 as primary antibody.

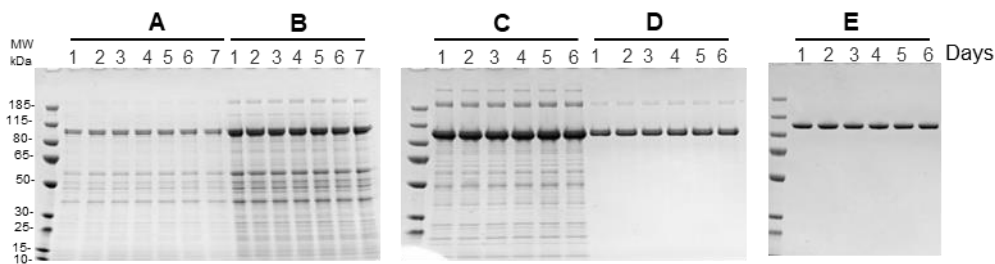

**Figure S2. R0.6C stability during purification.** R0.6C protein does not degrade when held at 2-8°C for 7 days. Coomassie blue-stained 4-12.5% polyacrylamide gel of fermentation and different purification steps. (A) Supernatant; (B) Diafiltrate; (C) Capturing (IEC Q HP column); (D) HCP removal (IEC SP HP column); (E) Polishing(IEC Q HP column).
